# Supplementary material
Source: PubMed Central journal article supplement (PMC5444115)
Supplement: AAC.02671-16_zac006176232s1.pdf [file AAC.02671-16_zac006176232s1.pdf]

1 **Table S1. Demographics of patients with Gram-negative bloodstream infections at Duke University Medical Center from**  
 2 **2002-2015, stratified by bacterial group.**

|                             | Enterobacteriaceae | Non-lactose fermenting <sup>a</sup> | <i>P. aeruginosa</i> | Anaerobes | Pasteurellaceae | Other Gram negative | P-value <sup>b</sup> |
|-----------------------------|--------------------|-------------------------------------|----------------------|-----------|-----------------|---------------------|----------------------|
|                             | N = 1343           | N = 262                             | N = 158              | N = 33    | N = 16          | N = 6               |                      |
|                             | n (%)              | n (%)                               | n (%)                | n (%)     | n (%)           | n (%)               |                      |
| <b>Age (mean)</b>           | 61.7               | 58.2                                | 61.9                 | 62.1      | 57.1            | 59.0                | 0.89                 |
| <b>Race/Ethnicity</b>       |                    |                                     |                      |           |                 |                     | <b>0.05</b>          |
| White                       | 882 (66)           | 190 (73)                            | 121 (77)             | 19 (58)   | 10 (63)         | 4 (67)              |                      |
| Black                       | 396 (29)           | 58 (22)                             | 29 (18)              | 13 (39)   | 6 (38)          | 1 (17)              |                      |
| Hispanic                    | 9 (<1)             | 1 (<1)                              | 0 (0)                | 0 (0)     | 0 (0)           | 0 (0)               |                      |
| Native American             | 9 (<1)             | 2 (1)                               | 0 (0)                | 1 (3)     | 0 (0)           | 0 (0)               |                      |
| Asian                       | 19 (1)             | 3 (1)                               | 1 (1)                | 0 (0)     | 0 (0)           | 0 (0)               |                      |
| Other/unknown               | 28 (2)             | 8 (3)                               | 7 (4)                | 0 (0)     | 0 (0)           | 1 (17)              |                      |
| <b>Female gender</b>        | 611 (45)           | 115 (44)                            | 64 (41)              | 17 (52)   | 8 (50)          | 1 (17)              |                      |
| <b>Past Medical History</b> |                    |                                     |                      |           |                 |                     |                      |
| Recent glucocorticoid use   | 300 (22)           | 96 (37)                             | 59 (37)              | 7 (21)    | 5 (31)          | 1 (17)              | <b>&lt;0.0001</b>    |
| Neoplasm                    | 517 (38)           | 101 (39)                            | 64 (41)              | 14 (42)   | 6 (38)          | 1 (17)              | <b>0.02</b>          |
| Diabetes mellitus           | 460 (34)           | 83 (32)                             | 53 (34)              | 15 (45)   | 9 (56)          | 1 (17)              | 0.14                 |

|                                       |          |          |         |         |         |         |                   |
|---------------------------------------|----------|----------|---------|---------|---------|---------|-------------------|
| Transplant                            | 162 (12) | 58 (22)  | 39 (25) | 2 (6)   | 2 (13)  | 2 (33)  | <b>&lt;0.0001</b> |
| Surgery in past 30 days               | 336 (25) | 77 (29)  | 48 (30) | 18 (55) | 1 (6)   | 0 (0)   | <b>0.004</b>      |
| Hemodialysis dependence               | 129 (10) | 25 (10)  | 13 (8)  | 4 (12)  | 1 (6)   | 1 (17)  | 0.88              |
| Rheumatologic disorder                | 31 (2)   | 8 (3)    | 6 (4)   | 0 (0)   | 0 (0)   | 0 (0)   | 0.13              |
| <b>Site of acquisition</b>            |          |          |         |         |         |         | <b>0.04</b>       |
| Community-acquired                    | 968 (72) | 141 (54) | 78 (49) | 20 (61) | 12 (75) | 6 (100) |                   |
| Hospital-acquired                     | 375 (28) | 121 (46) | 80 (51) | 13 (39) | 4 (25)  | 0 (0)   |                   |
| <b>Source of infection</b>            |          |          |         |         |         |         | <b>&lt;0.0001</b> |
| Pneumonia                             | 58 (4)   | 56 (21)  | 39 (25) | 1 (3)   | 7 (44)  | 0 (0)   |                   |
| Urine/pyelonephritis                  | 486 (36) | 33 (13)  | 30 (19) | 2 (6)   | 1 (6)   | 0 (0)   |                   |
| Abscess                               | 58 (4)   | 9 (3)    | 6 (4)   | 12 (36) | 1 (6)   | 0 (0)   |                   |
| Line-associated                       | 142 (11) | 43 (16)  | 14 (9)  | 1 (3)   | 0 (0)   | 1 (17)  |                   |
| Skin/soft tissue                      | 66 (5)   | 19 (7)   | 10 (6)  | 7 (21)  | 2 (13)  | 1 (17)  |                   |
| Biliary tract                         | 116 (9)  | 7 (3)    | 4 (3)   | 0 (0)   | 0 (0)   | 0 (0)   |                   |
| Other                                 | 124 (9)  | 6 (2)    | 21 (13) | 7 (21)  | 5 (31)  | 3 (50)  |                   |
| Source not identified                 | 293 (22) | 69 (26)  | 34 (22) | 3 (9)   | 0 (0)   | 1 (17)  |                   |
| <b>Total APACHE-II score (mean)</b>   | 14.7     | 15.3     | 16.3    | 15.5    | 14.3    | 13.8    | <b>0.002</b>      |
| <b>Chronic APACHE-II score (mean)</b> | 3.5      | 4.2      | 4.2     | 3.6     | 3.4     | 3.3     | <b>0.0002</b>     |

<sup>a</sup> Patients with *P. aeruginosa* BSI are included

---

<sup>b</sup> P-values compare Enterobacteriaceae vs. *P. aeruginosa*

3

4 **Table S2. Multivariable Cox regression analysis of clinical and bacterial factors influencing *Staphylococcus aureus* and Gram-negative**  
5 **bloodstream infection mortality in inpatients at Duke University Medical Center from 2005-2015.**

| Parameter                                         | Hazard ratio | 95% CI      | P-value           |
|---------------------------------------------------|--------------|-------------|-------------------|
| <b>Age</b>                                        | 1.423        | 1.338-1.515 | <b>&lt;0.0001</b> |
| <b>Female gender</b>                              | 1.127        | 0.952-1.332 | 0.164             |
| <b>Race<sup>a</sup></b>                           |              |             |                   |
| Black                                             | 1.225        | 1.012-1.477 | <b>0.036</b>      |
| Other                                             | 0.716        | 0.452-1.078 | 0.130             |
| <b><i>Pseudomonas aeruginosa</i> BSI</b>          | 1.364        | 1.030-1.779 | <b>0.026</b>      |
| <b>APACHE-II chronic health score</b>             | 1.189        | 1.125-1.262 | <b>&lt;0.0001</b> |
| <b>MDR</b>                                        | 0.929        | 0.784-1.100 | 0.394             |
| <b>Appropriate antibiotic therapy<sup>b</sup></b> | 1.025        | 0.853-1.240 | 0.792             |
| <b>Days to line removal<sup>c</sup></b>           |              |             |                   |
| 1                                                 | 0.724        | 0.272-1.768 | 0.492             |
| 2                                                 | 0.710        | 0.266-1.735 | 0.465             |
| ≥3                                                | 1.263        | 0.405-3.354 | 0.658             |
| No line-associated infection                      | 1.863        | 1.071-3.518 | <b>0.039</b>      |
| <b>BSI source<sup>d</sup></b>                     |              |             |                   |
| Biliary                                           | 0.657        | 0.371-1.092 | 0.125             |
| Pneumonia                                         | 2.351        | 1.750-3.169 | <b>&lt;0.0001</b> |
| Skin/soft tissue                                  | 0.501        | 0.318-0.766 | <b>0.002</b>      |
| Abscess                                           | 0.720        | 0.411-1.188 | 0.221             |
| Other                                             | 0.956        | 0.693-1.317 | 0.782             |

|                       |       |             |         |
|-----------------------|-------|-------------|---------|
| Source not identified | 2.139 | 1.657-2.786 | <0.0001 |
|-----------------------|-------|-------------|---------|

---

<sup>a</sup> Reference group is white patients

<sup>b</sup> Time-dependent variable in which *no appropriate antibiotic therapy* is the reference

<sup>c</sup> Reference group is patients with line-associated infections and line removal on day 0

<sup>d</sup> Reference group is BSI from a urine/pyelonephritis source. The line BSI source data is not included due to collinearity between this covariate and other covariates included in the model.

**Abbreviations:** BSI, Bloodstream infection; CI, Confidence interval; MDR, multidrug resistant

6

7

8 **Table S3. Multivariable Cox regression analysis of clinical and bacterial factors influencing *Staphylococcus aureus* and Gram-negative**  
9 **bloodstream infection (BSI) mortality in inpatients at Duke University Medical Center from 2002-2015.** The covariate 'Days to BSI' was  
10 added to this model, and represents days from hospital admission to BSI.

| Parameter                                         | Hazard ratio | 95% CI       | P-value           |
|---------------------------------------------------|--------------|--------------|-------------------|
| <b>Age</b>                                        | 1.377        | 1.286-1.475  | <b>&lt;0.0001</b> |
| <b>Female gender</b>                              | 1.109        | 0.919-1.336  | 0.280             |
| <b>Race<sup>a</sup></b>                           |              |              |                   |
| Black                                             | 1.248        | 1.012-1.533  | <b>0.036</b>      |
| Other                                             | 0.854        | 0.515-1.333  | 0.514             |
| <b><i>Pseudomonas aeruginosa</i> BSI</b>          | 1.335        | 0.969-1.803  | 0.067             |
| <b>APACHE-II chronic health score</b>             | 1.163        | 1.097-1.238  | <b>&lt;0.0001</b> |
| <b>MDR</b>                                        | 1.021        | 0.843-1.234  | 0.834             |
| <b>Appropriate antibiotic therapy<sup>b</sup></b> | 1.496        | 1.008-2.297  | 0.054             |
| <b>Days to line removal<sup>c</sup></b>           |              |              |                   |
| 1                                                 | 0.538        | 0.193-1.310  | 0.122             |
| 2                                                 | 0.548        | 0.209-1.295  | 0.189             |
| ≥3                                                | 0.832        | 0.238-2.277  | 0.743             |
| No line-associated infection                      | 5.156        | 0.278-27.509 | 0.122             |
| <b>BSI source<sup>d</sup></b>                     |              |              |                   |
| Biliary                                           | 0.615        | 0.307-1.119  | 0.137             |
| Pneumonia                                         | 2.190        | 1.574-3.067  | <b>&lt;0.0001</b> |
| Skin/soft tissue                                  | 0.536        | 0.324-0.854  | <b>0.011</b>      |
| Abscess                                           | 0.725        | 0.389-1.262  | 0.282             |

|                       |       |             |                   |
|-----------------------|-------|-------------|-------------------|
| Other                 | 1.018 | 0.714-1.453 | 0.920             |
| Source not identified | 2.021 | 1.509-2.740 | <b>&lt;0.0001</b> |
| <b>Days to BSI</b>    | 1.005 | 1.002-1.008 | 0.001             |

---

<sup>a</sup> Reference group is white patients

<sup>b</sup> Time-dependent variable in which *no appropriate antibiotic therapy* is the reference

<sup>c</sup> Reference group is patients with line-associated infections and line removal on day 0

<sup>d</sup> Reference group is BSI from a urine/pyelonephritis source. The line BSI source data is not included due to collinearity between this covariate and other covariates included in the model.

**Abbreviations:** BSI, Bloodstream infection; CI, Confidence interval; MDR, multidrug resistant

11

12

13

14 **Figure S1.** Trends in the multidrug resistant (MDR) phenotype among bloodstream isolates of *S. aureus*, Enterobacteriaceae, and *P. aeruginosa*  
15 at Duke University Medical Center.

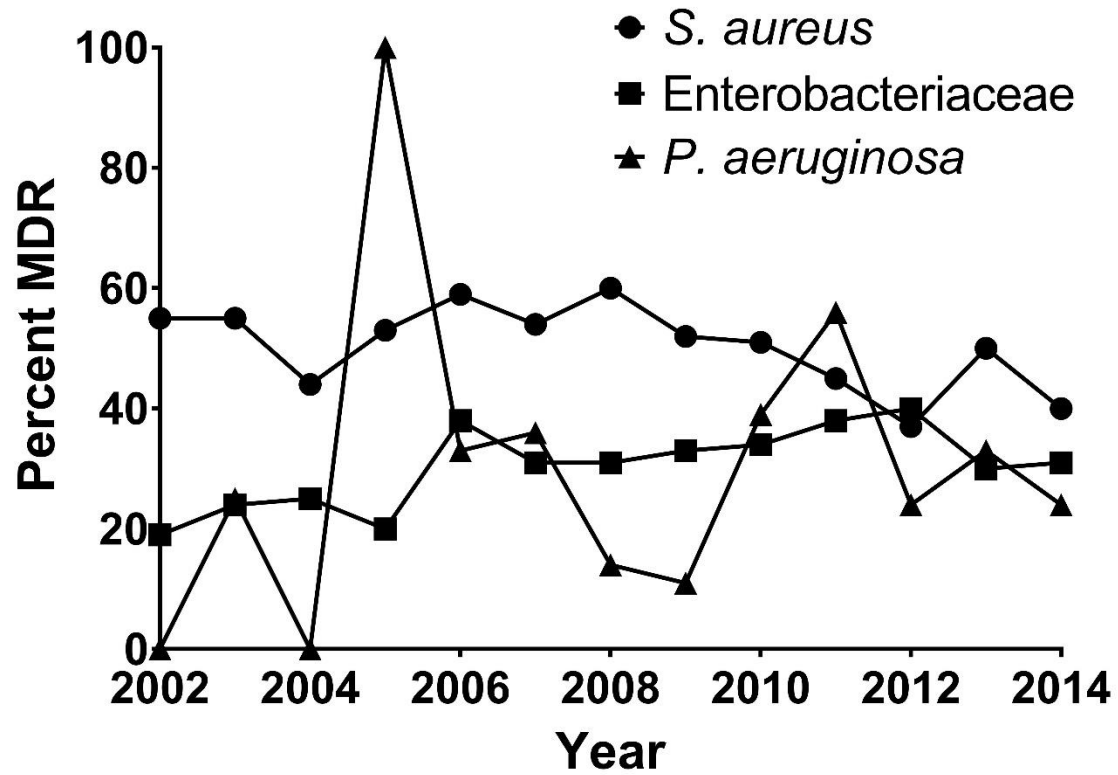

16
